# Supplementary material for: Depositional controls and budget of organic carbon burial in fine-grained sediments of the North Sea – the Helgoland Mud Area as a test field
Source: Copernicus journal article supplement (doi:10.5194/egusphere-2024-1632), 2024-06-28
Supplement: Supplementary file 1 [file egusphere-2024-1632-supplement.pdf]

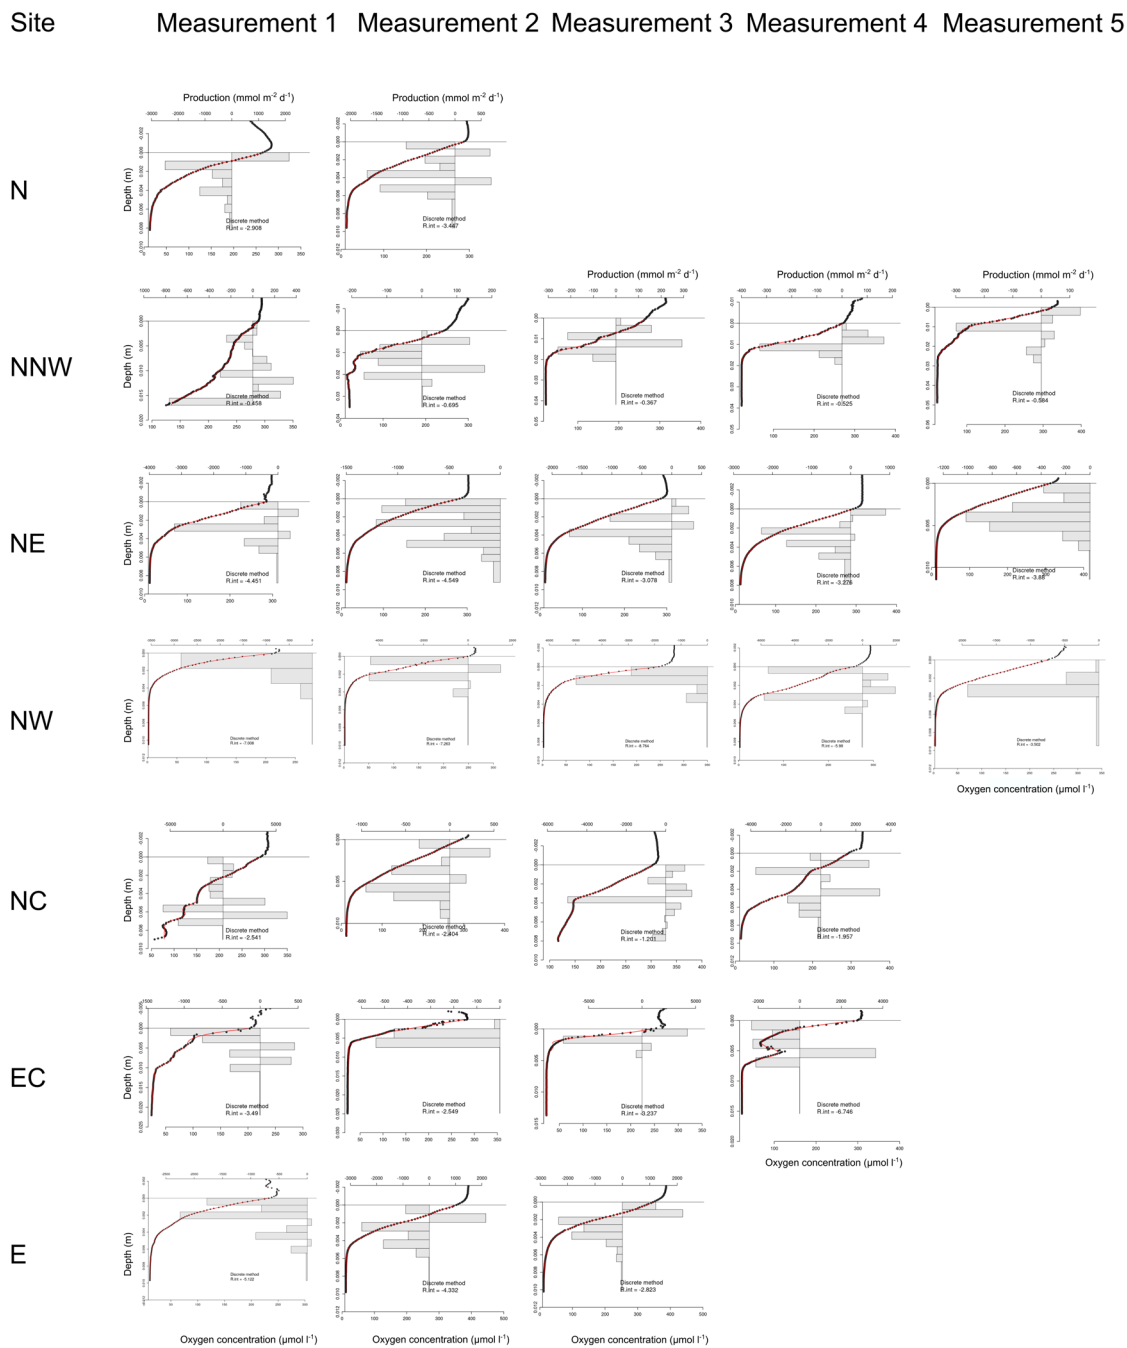

**Figure S1: Zoom in for visibility. Oxygen measurements (black dots) and modelled aerobic remineralisation rates (red line, bars) for sites N, NNW, NE, NW, NC, EC and E after Berg et al. (1998) following the R script of van de Velde et al. (2022). Integrated aerobic remineralisation rates are presented in the respective plots (R.int). See Table 1 for site abbreviations.**

Site Measurement 1 Measurement 2 Measurement 3 Measurement 4

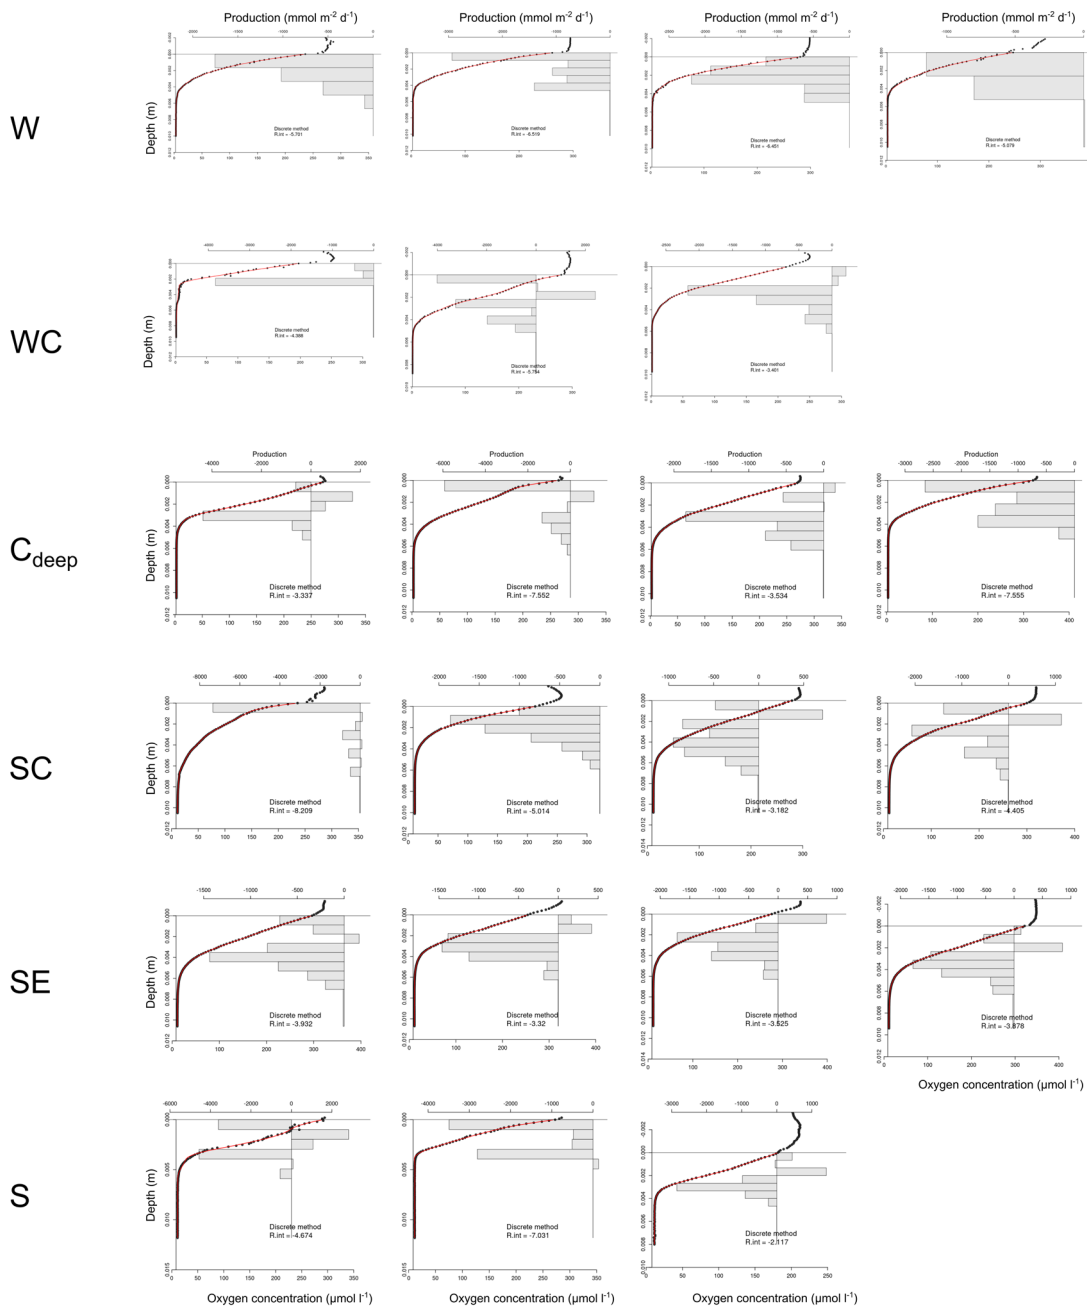

5

**Figure S2: Zoom in for visibility. Oxygen measurements (black dots) and modelled aerobic remineralisation rates (red line, bars) for sites W, WC, C<sub>deep</sub>, SC, SE and S after Berg et al. (1998) following the R script of van de Velde et al. (2022). Integrated aerobic remineralisation rates are presented in the respective plots (R<sub>int</sub>). See Table 1 for site abbreviations.**

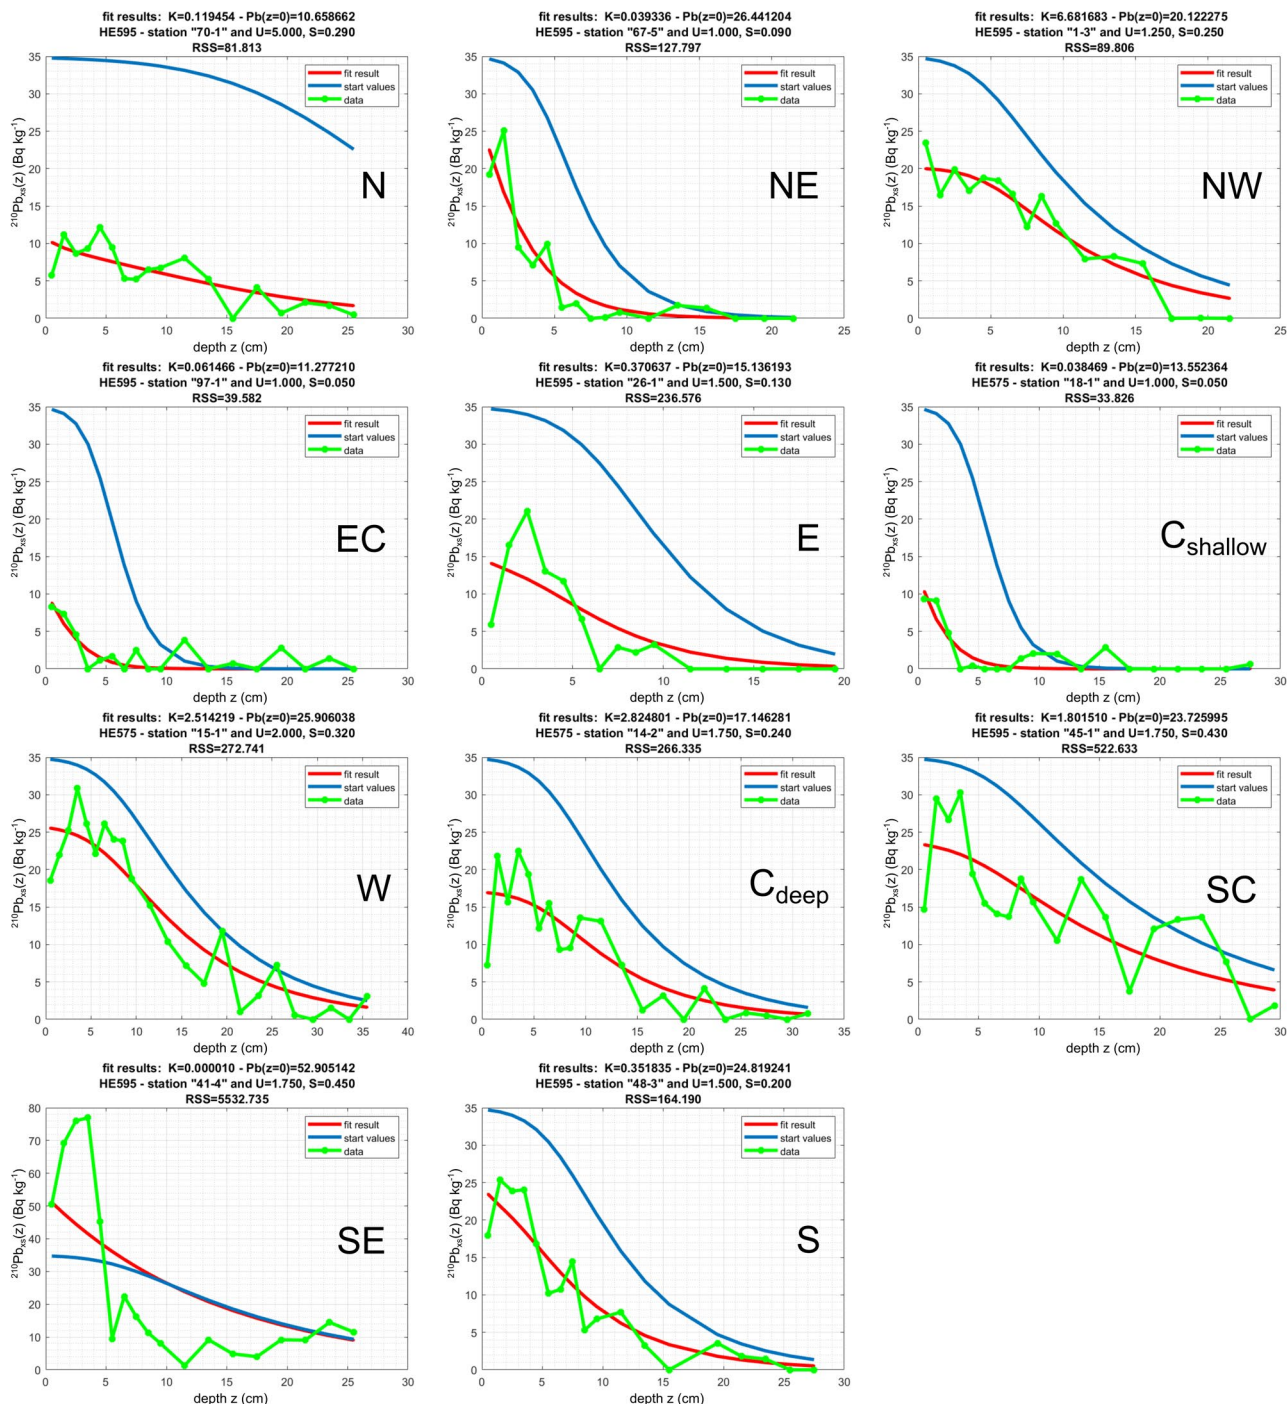

10 **Figure S3: Zoom in for visibility. Model results (red lines) for the steady state sedimentation rates and sediment mixing rates after Gardner et al. (1987). The green dots and lines represent the measurements and start values for the model before optimisation are the blue lines. See Table 1 for site abbreviations.**

## 15 **Supplement references**

Berg, P., Risgaard-Petersen, N., and Rysgaard, S.: Interpretation of measured concentration profiles in sediment pore water, *Limnol. Oceanogr.*, 43, 1500–1510, <https://doi.org/10.4319/lo.1998.43.7.1500>, 1998.

Gardner, L. R., Sharma, P., and Moore, W. S.: A regeneration model for the effect of bioturbation by fiddler crabs on  $^{210}\text{Pb}$  profiles in salt marsh sediments, *J. Environ. Radioact.*, 5, 25–36, [https://doi.org/10.1016/0265-931X\(87\)90042-7](https://doi.org/10.1016/0265-931X(87)90042-7), 1987.

20 van de Velde, S. J., Burdorf, L. D. W., and Meysman, F. J. R.: Code for: FLIPPER - flexible interpretation of porewater profiles and estimation of rates., <https://doi.org/10.5281/zenodo.662498>, 2022.
