# Supplementary material for: Depositional controls and budget of organic carbon burial in fine-grained sediments of the North Sea – the Helgoland Mud Area as a test field
Source: Copernicus journal article supplement (doi:10.5194/egusphere-2024-1632), 2024-06-28
Supplement: Supplementary file [file egusphere-2024-1632-AC1-supplement.pdf]

Dear Stefano Ciavatta and anonymous Reviewer #1,

We thank the reviewer for the thoughtful and constructive feedback on our manuscript. We agree that it will be useful to provide additional information in the supplementary material on the literature review. Regarding the methodology of the organic carbon burial efficiency in the comparison part, a detailed reply on this topic is given in the reply to Reviewer #2. During revision of the manuscript, the other minor specific comments will be addressed.

Kind regards

Daniel Müller, on behalf of all co-authors
